# Supplementary material
Source: PubMed Central journal article supplement (PMC6076439)
Supplement: NIHMS77877-supplement-Supplementary_Figure_S3.pdf [file NIHMS77877-supplement-Supplementary_Figure_S3.pdf]

Supplementary Figure S3

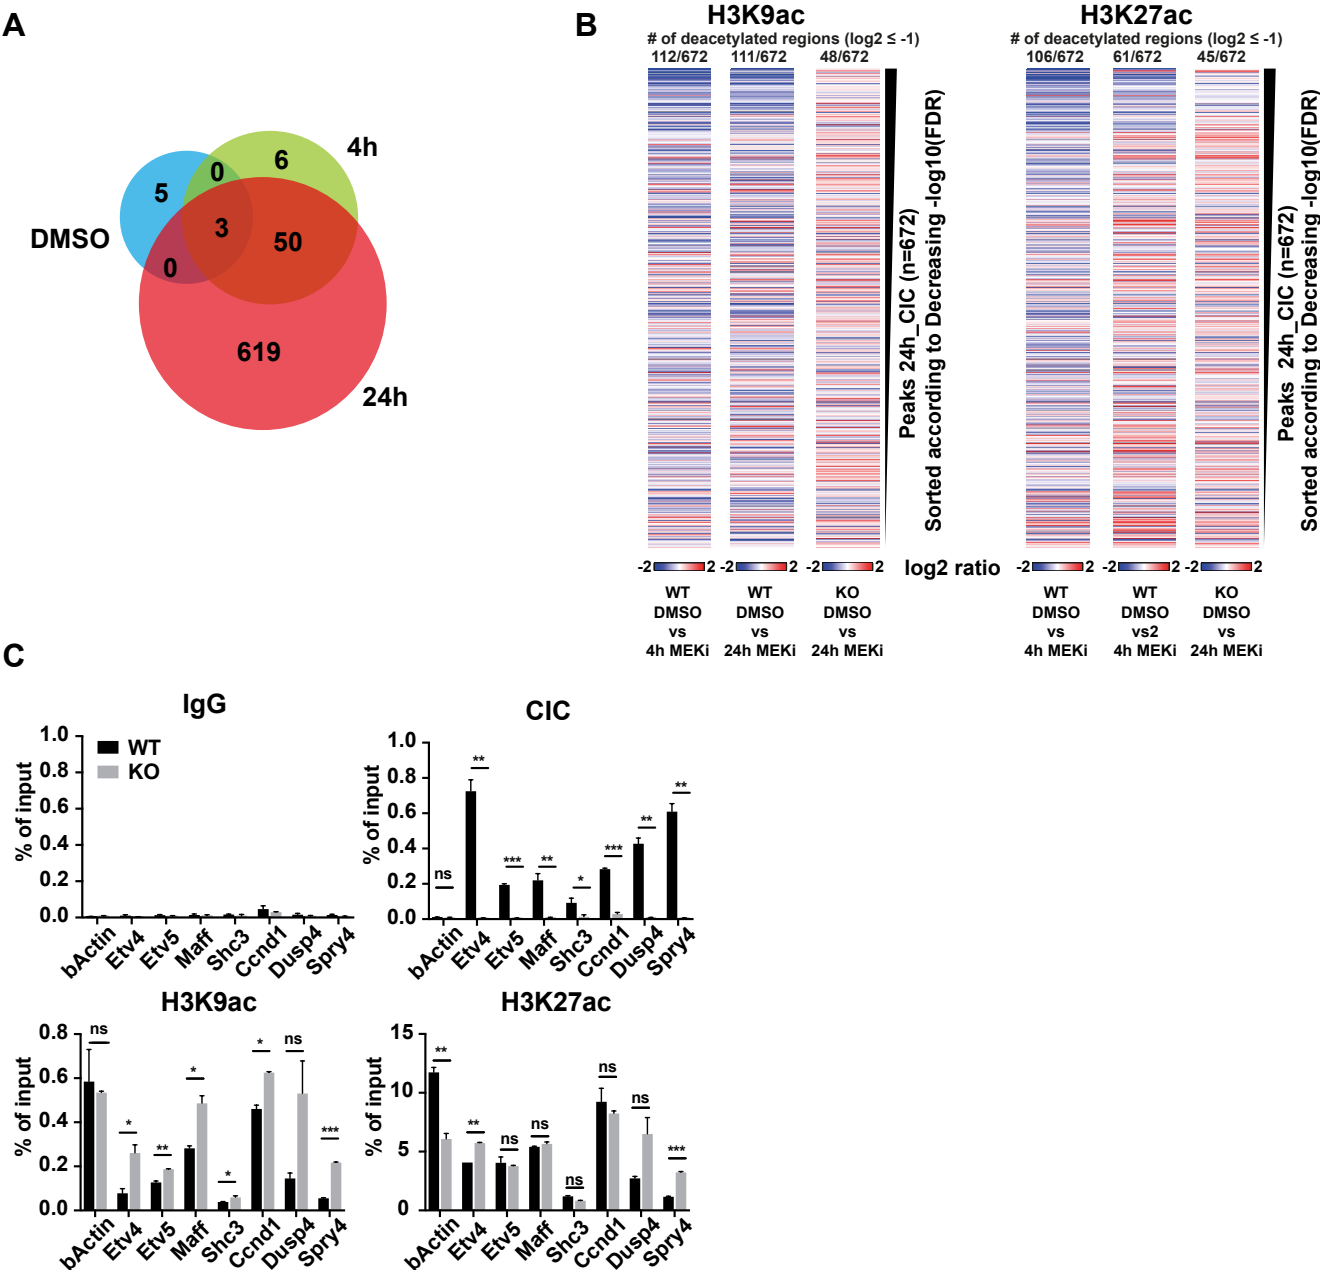

Supplementary Figure S3

**A)** Overlap of CIC peaks found in G144 cells treated with DMSO and 4h and 24h MEKi respectively

**B)** Ratio of histone acetylation reads for DMSO vs 4h MEKi and DMSO vs 24h MEKi respectively

counted at CIC peaks (called in the 24h MEKi sample) ( $\pm 500$ bp). Each line represents the ratio

value of one peak. **C)** ChIP-qPCR validation of increase of histone acetylation in mouse ESCs. Data

are represented as mean  $\pm$ SD,  $n=3$  (pvalue: \* $<0.05$ , \*\* $<0.01$ , \*\*\* $<0.001$ )
